# Supplementary material for: Intrinsic Functional Connectivity Networks in Healthy Elderly Subjects: A Multiparametric Approach with Structural Connectivity Analysis
Source: Hindawi journal article supplement (doi:10.1155/2014/947252), 2014-01-01
Supplement: f1 [file 947252.f1.pdf]

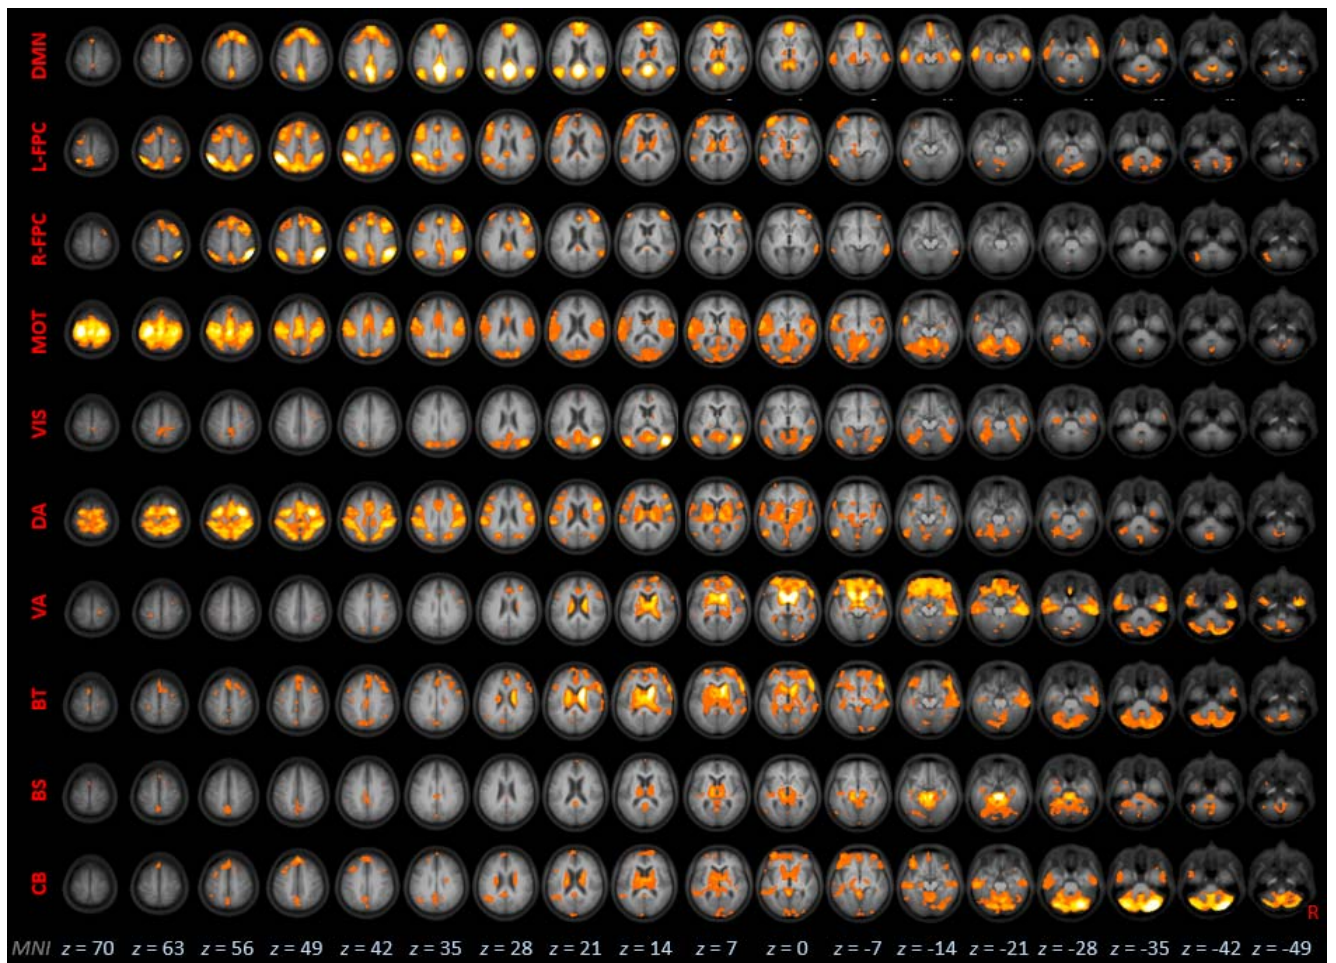

**Supplementary Figure:** Complementary axial slices of the ten investigated ICNs at the group level according to **Figure 6**. Abbreviations: DMN – Default Mode Network, PFC – Frontoparietal Control, MOT – Motor, VIS – Visuospatial, DA – Dorsal Attention, VA – Ventral Attention, BT – Basal ganglia Thalamic, BS – Brainstem, CB – Cerebellar.
